# Supplementary material
Source: bioRxiv or medRxiv preprint supplement (https://medrxiv.org/content/medrxiv/early/2021/01/13/2021.01.11.21249600/DC1/embed/media-1.pdf)

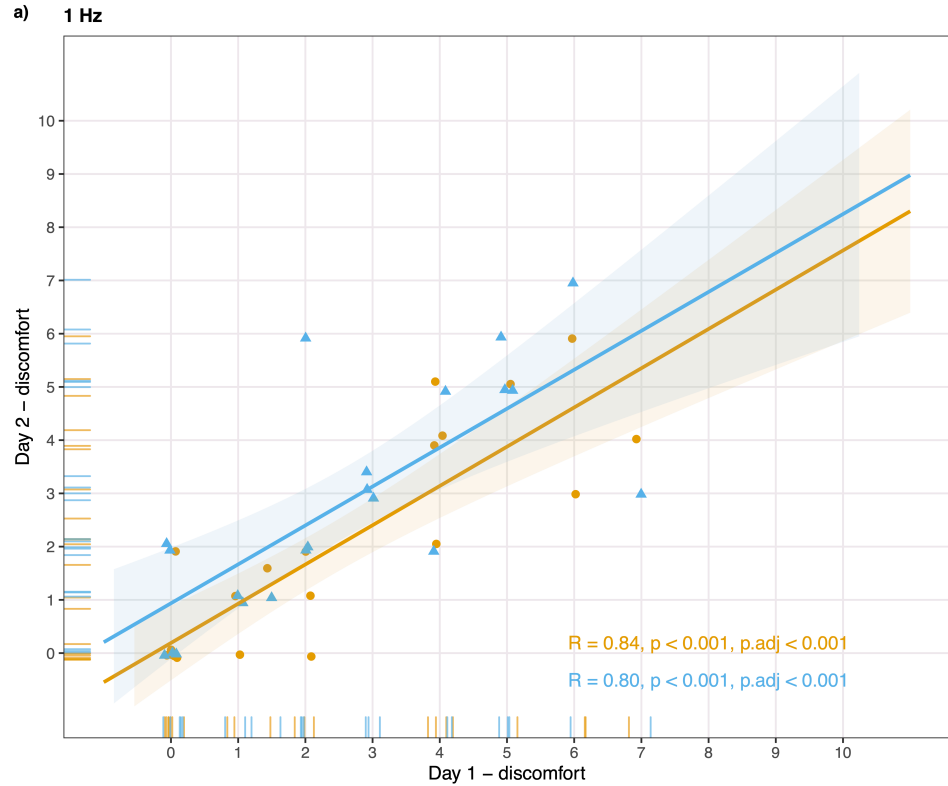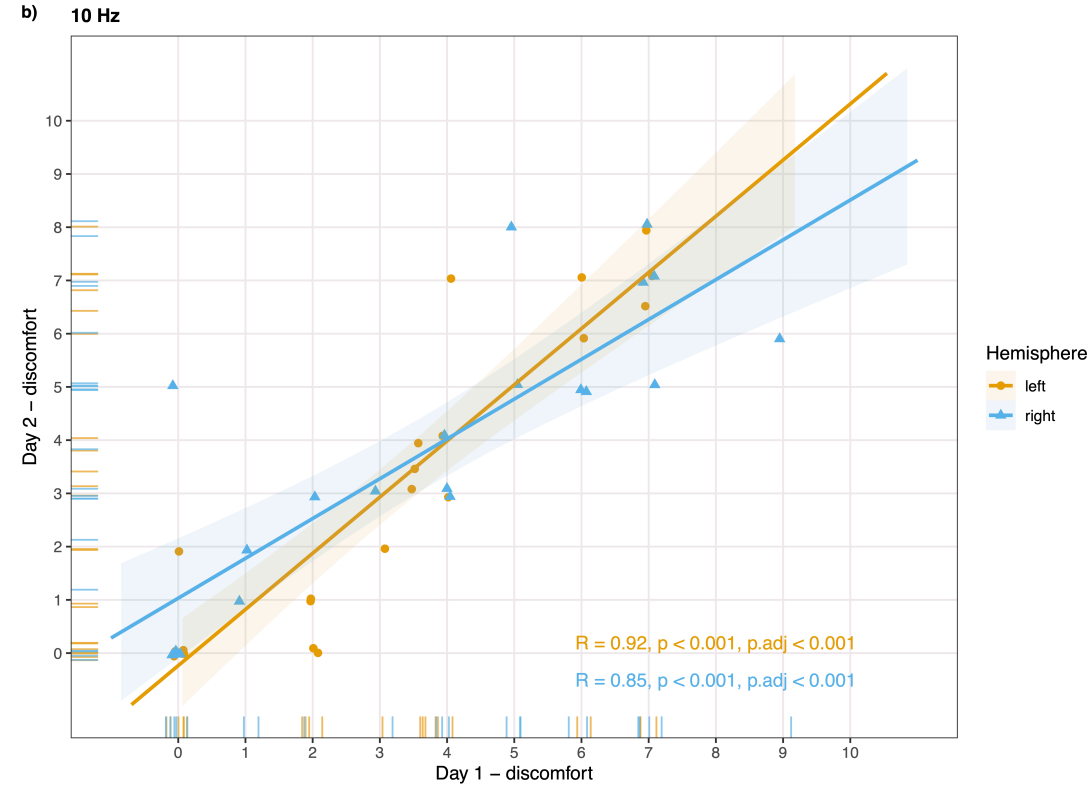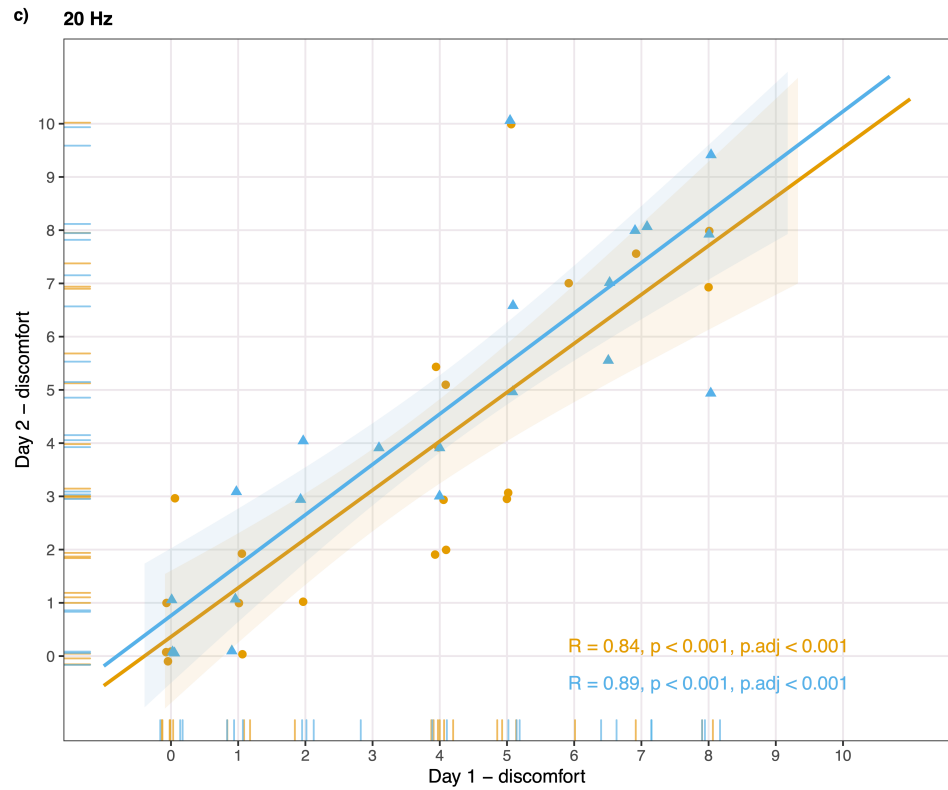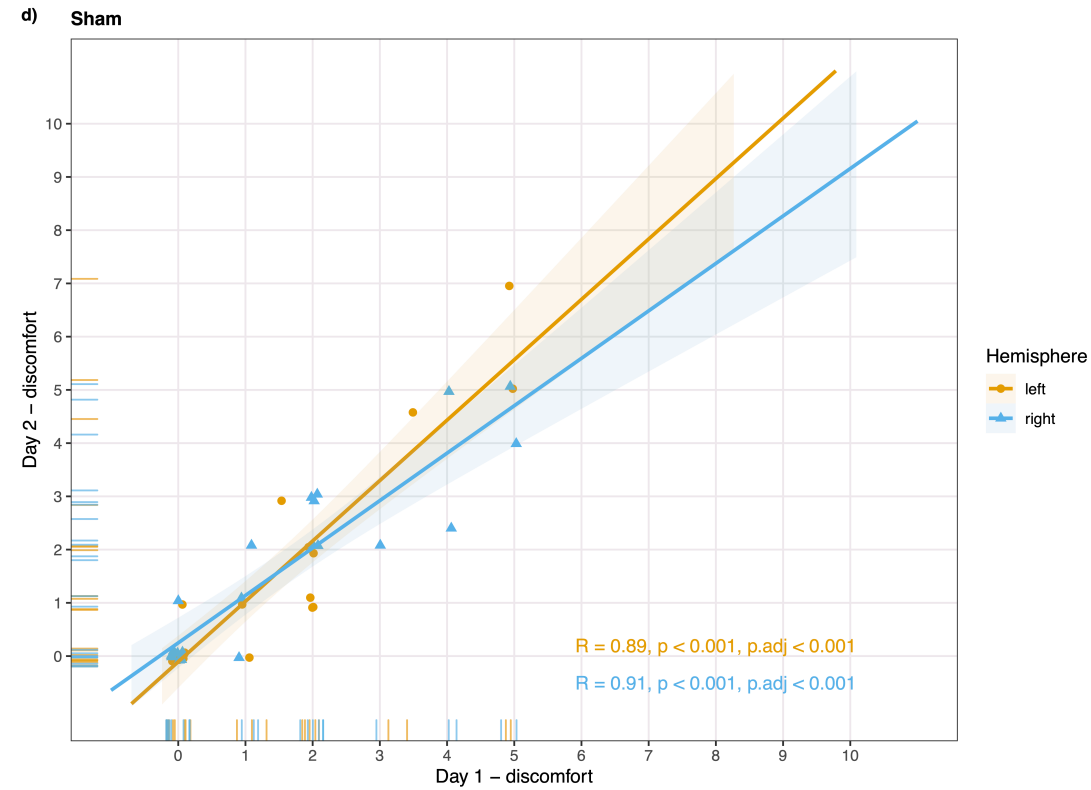

Supplement: Supplementary file [file media-1.pdf]
